# Supplementary material
Source: PubMed Central journal article supplement (PMC4696571)
Supplement: ASN.2014111063_ASN2014111063SupplementaryData.pdf [file ASN.2014111063_ASN2014111063SupplementaryData.pdf]

## SUPPLEMENTAL DATA

**Supplemental Table 1.** Demographics of cohort utilized for cross-sectional comparison of TMAO concentrations among CKD stages

|                                   | Total Cohort<br>(n=104) | Controls<br>(n=17) | CKD-IIIA<br>(n=9) | CKD-IIIB<br>(n=28) | CKD-IV/V<br>(n=25) | ESRD<br>(n=25) | P-value |
|-----------------------------------|-------------------------|--------------------|-------------------|--------------------|--------------------|----------------|---------|
| <b>Demographics</b>               |                         |                    |                   |                    |                    |                |         |
| Age (years)                       | 57.6 ± 14.2             | 44.1 ± 14.6        | 53.4 ± 7.4        | 57.5 ± 13.8        | 62.3 ± 13.3        | 63.9 ± 10.2    | < 0.001 |
| Sex                               |                         |                    |                   |                    |                    |                | 0.015   |
| Female                            | 52 (50.0%)              | 12 (70.6%)         | 3 (33.3%)         | 16 (57.1%)         | 15 (60.0%)         | 6 (24.0%)      |         |
| Male                              | 52 (50.0%)              | 5 (29.4%)          | 6 (66.7%)         | 12 (42.9%)         | 10 (40.0%)         | 19 (76.0%)     |         |
| Race                              |                         |                    |                   |                    |                    |                | 0.751   |
| African-American                  | 24 (23.1%)              | 3 (17.6%)          | 3 (33.3%)         | 7 (25.0%)          | 6 (24.0%)          | 5 (20.0%)      |         |
| Caucasian                         | 71 (68.3%)              | 13 (76.5%)         | 6 (66.7%)         | 19 (67.9%)         | 18 (72.0%)         | 15 (60.0%)     |         |
| Other                             | 9 (8.7%)                | 1 (5.9%)           | 0 (0.0%)          | 2 (7.1%)           | 1 (4.0%)           | 5 (20.0%)      |         |
| Hypertension                      |                         |                    |                   |                    |                    |                | < 0.001 |
| No                                | 26 (25.0%)              | 12 (70.6%)         | 4 (44.4%)         | 6 (21.4%)          | 3 (12.0%)          | 1 (4.0%)       |         |
| Yes                               | 78 (75.0%)              | 5 (29.4%)          | 5 (55.6%)         | 22 (78.6%)         | 22 (88.0%)         | 24 (96.0%)     |         |
| Smoking History                   | 54 (52.4%)              | 4 (23.5%)          | 6 (66.7%)         | 16 (57.1%)         | 14 (56.0%)         | 14 (58.3%)     | 0.131   |
| BMI                               | 31.3 ± 7.0              | 29.1 ± 6.6         | 36.5 ± 6.5        | 33.2 ± 7.2         | 30.9 ± 7.7         | 29.1 ± 4.9     | 0.023   |
| Diabetes                          | 39 (37.9%)              | 2 (11.8%)          | 6 (66.7%)         | 11 (39.3%)         | 10 (40.0%)         | 10 (41.7%)     | 0.071   |
| History of CAD                    | 31 (30.1%)              | 2 (11.8%)          | 1 (11.1%)         | 10 (35.7%)         | 7 (28.0%)          | 11 (45.8%)     | 0.119   |
| History of CHF                    | 14 (13.6%)              | 0 (0.0%)           | 3 (33.3%)         | 4 (14.3%)          | 4 (16.0%)          | 3 (12.5%)      | 0.181   |
| History of PCI or CABG            | 19 (18.4%)              | 2 (11.8%)          | 2 (22.2%)         | 6 (21.4%)          | 4 (16.0%)          | 5 (20.8%)      | 0.924   |
| Etiology of CKD                   |                         | N/A                |                   |                    |                    |                | < 0.001 |
| DM                                | 40 (46.5%)              | -                  | 6 (66.7%)         | 14 (50.0%)         | 11 (44.0%)         | 9 (37.5%)      |         |
| Glomerular                        | 6 (7.0%)                | -                  | 0 (0.0%)          | 1 (3.6%)           | 1 (4.0%)           | 4 (16.7%)      |         |
| Hypertension/CV                   | 15 (17.4%)              | -                  | 1 (11.1%)         | 6 (21.4%)          | 4 (16.0%)          | 4 (16.7%)      |         |
| PKD                               | 11 (12.8%)              | -                  | 2 (22.2%)         | 3 (10.7%)          | 5 (20.0%)          | 1 (4.2%)       |         |
| Urologic                          | 9 (10.5%)               | -                  | 0 (0.0%)          | 1 (3.6%)           | 2 (8.0%)           | 6 (25.0%)      |         |
| Other                             | 5 (5.8%)                | -                  | 0 (0.0%)          | 3 (10.7%)          | 2 (8.0%)           | 0 (0.0%)       |         |
| <b>Laboratory Parameters</b>      |                         |                    |                   |                    |                    |                |         |
| eGFR (ml/min/1.73m <sup>2</sup> ) | 42.5 ± 27.1             | 96.8 ± 27.3        | 53.7 ± 8.4        | 39.3 ± 6.3         | 20.5 ± 5.0         | N/A            | < 0.001 |

Continuous variables presented as mean ± standard deviation

Abbreviations: CAD, coronary artery disease; PCI, percutaneous coronary intervention; CABG, coronary artery bypass grafting; TMAO, trimethylamine-N-oxide; eGFR, estimated glomerular filtration rate; ESRD, end-stage renal disease; CKD, chronic kidney disease; CV, cardiovascular; DM, diabetes mellitus; PKD, polycystic kidney disease; CHF, congestive heart failure

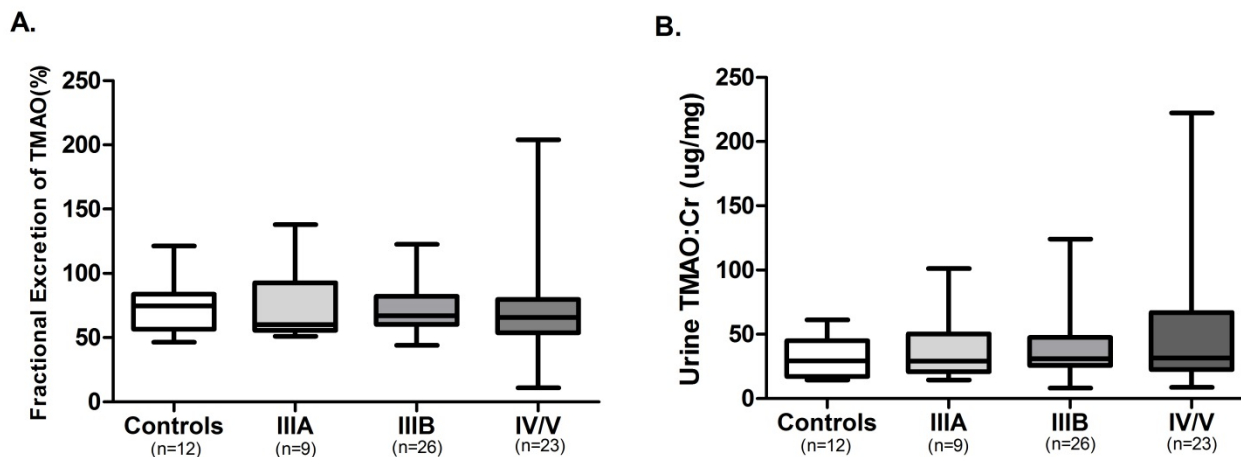

**Supplemental Figure 1. FE<sub>TMAO</sub> and TMAO:Cr Values Stratified by CKD Stage**

**(A)** Comparison of the spot fractional excretion of TMAO (FE<sub>TMAO</sub>) in controls and CKD patients with residual kidney function after stratification by CKD stage. **(B)** Comparison of the spot urine TMAO to creatinine ratio (TMAO:Cr) in controls and CKD patients with residual kidney function after stratification by CKD stage. (box plots depict median + interquartile range and whiskers illustrate minimum-maximum values;  $P=NS$  for all statistical comparisons).
